# Supplementary material
Source: HighWire-hosted journal article supplement (https://bmjophth.bmj.com/content/5/1/e000563)
Supplement: inline-supplementary-material-1 [file inline-supplementary-material-1.pdf]

## Supplementary files

Supplementary Table 1. Risk of Bias Assessment using Newcastle Ottawa Scale for cross-sectional studies

| Study        | Representativeness of COVID-19 related patients | Selection                                                                                                            | Overall participation rate $\geq 60\%$ | Information bias                                    |                                                                                    |                                                                                       | Overall Quality |
|--------------|-------------------------------------------------|----------------------------------------------------------------------------------------------------------------------|----------------------------------------|-----------------------------------------------------|------------------------------------------------------------------------------------|---------------------------------------------------------------------------------------|-----------------|
|              |                                                 | Selection of the patients without ocular manifestation from the same setting with patients with ocular manifestation |                                        | Ocular manifestation assessed objective examination | PCR tears and nasopharyngeal examination using standardised or structured protocol | Ocular manifestation and PCR assessed in the same way for the entire study population |                 |
| Guan et al   | No                                              | Yes                                                                                                                  | Yes                                    | Unclear                                             | Yes                                                                                | Yes                                                                                   | Good            |
| Wu et al     | Yes                                             | Yes                                                                                                                  | Unclear                                | Unclear                                             | Unclear                                                                            | Yes                                                                                   | Moderate        |
| Zhang et al  | Unclear                                         | Yes                                                                                                                  | Yes                                    | Yes                                                 | Unclear                                                                            | Yes                                                                                   | Good            |
| Chen et al   | No                                              | Yes                                                                                                                  | No                                     | Yes                                                 | Yes                                                                                | n/a                                                                                   | Moderate        |
| Kumar et al  | Yes                                             | Yes                                                                                                                  | Yes                                    | Yes                                                 | Yes                                                                                | Yes                                                                                   | Good            |
| Zhou et al   | No                                              | Yes                                                                                                                  | Yes                                    | Yes                                                 | Yes                                                                                | Yes                                                                                   | Good            |
| Deng et al   | No                                              | Unclear                                                                                                              | Yes                                    | No                                                  | Unclear                                                                            | Yes                                                                                   | Poor            |
| Karimi et al | No                                              | Yes                                                                                                                  | Yes                                    | Unclear                                             | Yes                                                                                | Yes                                                                                   | Good            |
| Fang et al   | No                                              | yes                                                                                                                  | yes                                    | Unclear                                             | Unclear                                                                            | Yes                                                                                   | Moderate        |

Supplementary Table 2. Risk of Bias Assessment using Newcastle Ottawa Scale for longitudinal studies

| Study         | Selection                                           |                                                                                                                      |                                                  |                                             | Comparability                                                                                              | Outcome                                                                                    |                                                 |                                       | Overall Quality |
|---------------|-----------------------------------------------------|----------------------------------------------------------------------------------------------------------------------|--------------------------------------------------|---------------------------------------------|------------------------------------------------------------------------------------------------------------|--------------------------------------------------------------------------------------------|-------------------------------------------------|---------------------------------------|-----------------|
|               | Representativeness of the COVID-19 related patients | Selection of the patients without ocular manifestation from the same setting with patients with ocular manifestation | Ascertainment of exposure (ocular manifestation) | PCR tears was not present at start of study | Comparability of all patients with and without ocular manifestation on the basis of the design or analysis | Assessment of outcome (PCR tears or disease severity) all patient receive the same methods | Was follow-up long enough for outcomes to occur | Adequacy of follow up of all patients |                 |
| Xia et al     | No                                                  | Yes                                                                                                                  | Unclear                                          | Yes                                         | Yes                                                                                                        | Yes                                                                                        | Yes                                             | Yes                                   | Good            |
| Valente et al | No                                                  | Yes                                                                                                                  | Yes                                              | Yes                                         | Yes                                                                                                        | Yes                                                                                        | Yes                                             | Yes                                   | Good            |
| Seah et al    | No                                                  | Yes                                                                                                                  | Yes                                              | Yes                                         | Yes                                                                                                        | Yes                                                                                        | No                                              | Yes                                   | Good            |
| Xie et al     | No                                                  | Unclear                                                                                                              | Yes                                              | Yes                                         | n/a                                                                                                        | Yes                                                                                        | No                                              | Yes                                   | Moderate        |
| Grimaud et al | No                                                  | Yes                                                                                                                  | Unclear                                          | n/a                                         | Yes                                                                                                        | No                                                                                         | No                                              | Yes                                   | Moderate        |

Supplementary Table 3. Risk of Bias Assessment for case series and case report studies

| Study           | Domains                                                                                                                                                                                                       | Ascertainment                                                                   |                                                               | Causality                                                                 |                                                  | Reporting                                                                                                                                                                        | Overall quality |
|-----------------|---------------------------------------------------------------------------------------------------------------------------------------------------------------------------------------------------------------|---------------------------------------------------------------------------------|---------------------------------------------------------------|---------------------------------------------------------------------------|--------------------------------------------------|----------------------------------------------------------------------------------------------------------------------------------------------------------------------------------|-----------------|
|                 | Does the patient(s) represent(s) the whole experience of the investigator (centre) or is the selection method unclear to the extent that other patients with similar presentation may not have been reported? | Was the exposure adequately ascertained? (the presence of ocular manifestation) | Was the outcome adequately ascertained? (PCR tears/elsewhere) | Were other alternative causes that may explain the observation ruled out? | Was follow-up long enough for outcomes to occur? | Is the case(s) described with sufficient details to allow other investigators to replicate the research or to allow practitioners make inferences related to their own practice? |                 |
| Chen et al      | Unclear                                                                                                                                                                                                       | Yes                                                                             | Yes                                                           | Yes                                                                       | Yes                                              | Yes                                                                                                                                                                              | Good            |
| Cheema et al    | Unclear                                                                                                                                                                                                       | Yes                                                                             | Yes                                                           | Yes                                                                       | Yes                                              | Yes                                                                                                                                                                              | Good            |
| Daruich et al   | Unclear                                                                                                                                                                                                       | Yes                                                                             | Yes                                                           | No                                                                        | Yes                                              | Yes                                                                                                                                                                              | Moderate        |
| Chiotos et al   | Yes                                                                                                                                                                                                           | Yes                                                                             | Yes                                                           | No                                                                        | Yes                                              | Yes                                                                                                                                                                              | Good            |
| Scalinci et al  | Unclear                                                                                                                                                                                                       | Yes                                                                             | Yes                                                           | No                                                                        | Yes                                              | Yes                                                                                                                                                                              | Moderate        |
| Hu et al        | No                                                                                                                                                                                                            | Yes                                                                             | Yes                                                           | Yes                                                                       | Yes                                              | Yes                                                                                                                                                                              | Good            |
| Navel et al     | No                                                                                                                                                                                                            | Yes                                                                             | Yes                                                           | Yes                                                                       | Yes                                              | Yes                                                                                                                                                                              | Good            |
| Ying Ying et al | Unclear                                                                                                                                                                                                       | Yes                                                                             | Yes                                                           | No                                                                        | Yes                                              | Yes                                                                                                                                                                              | Moderate        |
| Salducci et al  | Yes                                                                                                                                                                                                           | Yes                                                                             | Yes                                                           | No                                                                        | Yes                                              | Yes                                                                                                                                                                              | Good            |
| Wu et al        | Unclear                                                                                                                                                                                                       | Yes                                                                             | Yes                                                           | Unclear                                                                   | Yes                                              | No                                                                                                                                                                               | Moderate        |
| Wolfler et al   | No                                                                                                                                                                                                            | Yes                                                                             | No                                                            | No                                                                        | Yes                                              | No                                                                                                                                                                               | Poor            |
| Colavita et al  | Unclear                                                                                                                                                                                                       | Yes                                                                             | Yes                                                           | Yes                                                                       | Yes                                              | Yes                                                                                                                                                                              | Good            |
| Xuejie et al    | Unclear                                                                                                                                                                                                       | Yes                                                                             | Yes                                                           | Yes                                                                       | Yes                                              | Yes                                                                                                                                                                              | Good            |
| Ya et al        | Yes                                                                                                                                                                                                           | Yes                                                                             | Yes                                                           | No                                                                        | Yes                                              | Yes                                                                                                                                                                              | Good            |
| Casalino et al  | Unclear                                                                                                                                                                                                       | No                                                                              | Yes                                                           | No                                                                        | No                                               | Yes                                                                                                                                                                              | Poor            |
| Khavandi et al  | Unclear                                                                                                                                                                                                       | Yes                                                                             | Yes                                                           | Yes                                                                       | Yes                                              | Yes                                                                                                                                                                              | Good            |
| Lu et al        | No                                                                                                                                                                                                            | No                                                                              | Yes                                                           | No                                                                        | No                                               | No                                                                                                                                                                               | Poor            |
